# Supplementary material for: Contamination and oxidative stress biomarkers in estuarine fish following a mine tailing disaster
Source: PeerJ. 2020 Oct 28;8:e10266. doi: 10.7717/peerj.10266 (PMC7602685; doi:10.7717/peerj.10266)
Supplement: Supplemental Information 5 [file peerj-08-10266-s005.xlsx]

## Sheet: fish
Species	Zn_L	Cu_L	Cd_L	Pb_L	Hg_L	As_L	Se_L	Cr_L	Mn_L	Zn_M	Cu_M	Hg_M	As_M	Se_M	Cr_M	Mn_M	MT_L	MT_M	GSH_L	GSH_M
Cathoropus spixii	46.96	16.42	0.07	0.07	0.12	0.54	1.47	0.25	1.6	9.13	0.64	0.09	6.97	0.49	0.59	1.4	0.081	0.022	2.9	7246
Cathoropus spixii	249.12	201.6	0.29	0.14	0.94	1.15	6.48	0.31	4	38.06	1.27	0.22	10.16	0.82	0.25	0.91	0.027	0.079	3506	1989
Cathoropus spixii	148.23	13.35	0.08	0.14	1.19	2.69	5.53	0.39	4.48	3.58	0.22	0.24	19.37	0.54	0.44	0.22	0.056	0.251	2873	2698
Cathoropus spixii	266.5	182.56	0.23	0.09	0.5	0.54	4.58	0.36	4	46.64	0.44	0.13	1.46	0.71	0.38	2.85	0.033	0.061	10733	3469
Cathoropus spixii	62.42	8.93	0.12	0.04	0.18	1.52	2.05	0.32	2.82	9.73	0.36	0.12	7.95	0.45	0.5	3.16	0.03	0.196	1.59	1263
Cathoropus spixii	99.6	9.72	0.24	0.17	0.44	1.32	2.22	0.45	5.64	7.3	0.43	0.32	16.2	0.85	0.66	1.12	0.027	0.133	3924	14.04
Cathoropus spixii	80.19	3.68	0.16	0.06	0.28	0.31	1.37	0.31	4.45	10.08	0.29	0.16	3.4	0.37	0.63	2.26	0.025	0.045	2635	5716
Cathoropus spixii	18.48	0.66	0.26	0.17	0.03	1.17	0.34	0.39	0.17	4.89	0.14	0.26	0.38	0.39	0.42	0.11	0.303	0.288	4.97	2535
Cathoropus spixii	406.7	18.86	0.76	0.28	0.61	0.17	5.04	0.4	1.35	15.11	0.16	0.31	0.17	0.3	0.33	0.24	0.043	0.021	1758	2.25
Cathoropus spixii	151.6	70.04	0.33	0.2	0.63	0.96	3.98	0.42	2.99	4.25	0.18	0.22	14.13	0.51	0.29	0.34	0.005	0.103	11667	1.23
Cathoropus spixii	262.09	34.29	0.36	0.47	1.81	3.64	11.08	0.7	5.86	4.81	0.2	0.33	39.31	0.69	0.3	0.33	0.015	0.047	4.75	1854
Cathoropus spixii	89.62	129.12	0.26	0.14	1.47	2.96	10.54	0.4	4.16	5.54	0.28	0.29	18.99	0.81	0.29	0.2	0.018	0.209	12.25	1.76
Cathoropus spixii	55.86	11.39	0.22	0.18	0.43	0.25	2.58	0.38	3.55	4.69	0.3	0.13	2.49	0.29	0.38	0.62	0.034	0.012	3934	1078
Cathoropus spixii	693.82	8.95	0.26	0.14	0.37	0.22	4.27	0.46	1.59	19.92	1.05	0.19	0.43	0.63	0.42	0.28	0.075	0.117	13479	1439
Cathoropus spixii	25.25	24.39	0.21	0.2	0.47	0.13	5.53	0.35	1.45	3.89	0.25	0.25	0.13	0.88	0.42	0.57	0.019	0.171	8.24	3469
Genidens genidens	1310.86	5.13	2.36	1.91	3.02	0.2	9.75	0.62	2.02	26.74	0.33	0.56	0.1	0.32	0.41	0.33	0.018	0.047	6627	0.6
Genidens genidens	727.2	10.82	0.44	0.12	0.42	0.19	3.81	0.39	1.47	95.41	0.44	0.33	0.15	0.5	0.41	0.89	0.058	0.16	13.42	0.4
Genidens genidens	182.71	46.25	0.3	0.25	1.12	0.71	2.96	0.45	9	20.24	0.46	0.19	2.1	0.39	0.29	0.94	0.057	0.068	2793	0.47
Genidens genidens	937.8	8.08	0.23	0.46	0.45	0.36	3.76	0.38	2.47	20.81	0.43	0.33	1.44	0.61	0.53	0.65	0.097	0.165	3497	1741
Genidens genidens	381.63	20.98	0.6	0.5	0.91	0.22	4.72	0.4	1.57	8.31	0.18	0.26	0.21	0.35	0.27	0.22	0.059	0.075	1.47	0.87
Genidens genidens	593.89	13.45	0.58	0.26	0.74	0.12	4.06	0.45	1.15	23.07	0.21	0.56	0.18	0.42	0.3	0.61	0.061	0.137	4917	0.5
Genidens genidens	880.86	16.36	0.55	0.32	1.13	0.14	4.61	0.3	1.4	19.68	0.22	0.54	0.14	0.38	0.33	0.57	0.031	0.034	4767	0.67
Genidens genidens	933.8	13.28	0.38	0.51	0.61	0.14	3.37	0.58	1.56	23.01	0.61	0.24	0.21	0.57	0.58	0.42	0.145	0.195	2.95	0.77
Genidens genidens	463.49	8.08	0.64	0.32	0.28	0.13	3.63	0.55	0.89	9.89	0.13	0.26	0.17	0.38	0.5	0.34	0.442	0.308	1.68	0.31
Genidens genidens	523.68	6.18	0.44	0.56	0.9	0.2	3.28	0.42	1.17	17.13	0.28	0.29	0.31	0.36	0.49	0.44	0.047	0.143	11.24	2.02
Genidens genidens	572.15	7.95	0.44	0.31	2.05	0.26	5.3	0.48	2.32	7.15	0.21	0.25	0.65	0.37	0.25	0.45	0.076	0.211	6573	1569
Genidens genidens	843.88	11.2	0.28	0.24	0.56	0.17	4.47	0.52	1.51	12.14	0.3	0.2	0.24	0.47	0.54	0.23	0.187	0.091	2.55	0.51
Genidens genidens	570.7	15.57	0.64	0.32	0.84	0.19	6.41	0.49	1.69	13.95	0.34	0.21	0.12	0.39	0.34	0.43	0.022	0.043	2.87	0.62
Genidens genidens	126.05	9.81	0.26	0.27	0.77	1.16	5.32	0.57	4.68	7.02	0.11	0.11	9.62	0.36	0.45	0.48	0.059	0.03	1.26	0.74
Genidens genidens	234.28	2.41	0.07	0.03	0.14	0.21	2.37	0.4	1.27	11.48	0.3	0.11	0.23	0.46	0.34	0.25	0.073	0.014	4643	14.24
Genidens genidens	165.24	1.89	0.03	0.06	0.58	1.35	3.51	0.37	0.98	6.61	0.15	0.61	15.51	0.34	0.27	0.14	0.096	0.271	5.61	0.03
Genidens genidens	356.2	3.91	0.07	0.05	0.85	0.49	4.02	0.38	1.39	14.06	0.31	0.4	1.21	0.33	0.3	0.51	0.054	0.093	5927	1.99
Genidens genidens	926.6	4.05	0.38	0.16	0.39	0.54	3.45	0.39	1.36	8.86	0.15	0.13	2.35	0.38	0.26	0.27	0.183	0.181	5729	3.55
Eugerres brasilianus	47.81	3	0.57	0.06	0.14	0.93	4.21	0.53	6.05	5.91	1.22	0.22	0.33	1.05	0.51	0.76	0.09	0.096	1752	1683
Eugerres brasilianus	25.08	3.21	0.41	0.05	0.14	0.53	2.93	0.43	13.44	5.31	0.48	0.3	0.11	0.88	0.47	0.48	0.405	0.007	0.71	1224
Eugerres brasilianus	23.91	2.33	0.06	0.05	0.1	0.3	1.22	0.42	17.25	4.1	0.58	0.1	0.12	0.35	0.26	0.35	0.357	0.16	2445	14.21
Eugerres brasilianus	23.89	3.66	0.6	0.05	0.12	0.74	3.8	0.25	7.96	3.1	0.33	0.2	0.11	0.59	0.36	0.46	0.037	0.319	3943	2189
Eugerres brasilianus	20.65	2.08	0.28	0.08	0.15	0.91	1.47	0.67	5.76	3.41	0.6	0.19	0.3	0.56	0.44	0.23	0.059	0.102	2.39	0.46
Eugerres brasilianus	21.89	2.9	0.5	0.03	0.11	0.88	1.43	0.46	5.54	2.84	0.15	0.22	0.2	0.69	0.35	0.19	0.056	0.15	1.37	2021
Eugerres brasilianus	19.58	2.96	0.96	0.03	0.11	0.41	2.65	0.43	10.14	2.73	0.35	0.31	0.2	0.62	0.36	0.36	0.031	0.173	2603	3117
Eugerres brasilianus	32.09	1.32	0.04	0.02	0.07	0.34	1.59	0.37	4.27	2.52	0.24	0.11	0.12	0.71	0.44	0.53	0.08	0.039	3.03	3.49
Eugerres brasilianus	32.89	2.43	0.11	0.11	0.13	0.83	1.84	0.4	5.9	2.34	0.14	0.14	0.23	0.78	0.36	0.08	0.035	0.255	1.07	8.29
Eugerres brasilianus	20.46	1.95	0.05	0.02	0.11	0.26	1.94	0.43	2.26	3.57	0.2	0.17	0.2	0.33	0.36	0.37	0.04	0.215	2664	3.2
Eugerres brasilianus	31.53	2.11	0.07	0.06	0.09	0.28	2.63	0.36	6.97	2.77	0.25	0.07	0.2	0.53	0.36	0.09	0.059	0.26	2451	2259
Eugerres brasilianus	3.41	0.32	0.29	0.06	0.15	0.09	0.58	0.28	0.28	22.97	1.71	0.09	0.3	1.9	0.26	4.22	0.06	0.053	1.12	11.43
Eugerres brasilianus	25.46	2.11	0.19	0.12	0.06	0.63	2.18	0.43	7.43	2.98	0.29	0.13	0.2	0.7	0.36	0.34	0.056	0.651	1.27	3.93
Eugerres brasilianus	44.4	3.29	0.16	0.02	0.11	0.56	3.86	0.55	5.59	3.33	0.3	0.09	0.13	1	0.36	0.11	0.123	0.067	2.66	2346
Eugerres brasilianus	29.08	2.68	0.09	0.06	0.12	0.56	2.64	0.45	9.32	5.82	0.59	0.21	0.21	0.69	0.29	0.35	0.054	0.3	2.87	2.15
Eugerres brasilianus	119.56	2.39	0.25	0.14	0.1	0.56	2.1	0.42	11.5	2.39	0.18	0.11	0.2	0.43	0.36	0.3	0.04	0.004	7.33	3361
Eugerres brasilianus	68.26	2.43	0.4	0.04	0.13	0.47	2.63	0.43	7.62	3.94	0.37	0.19	0.2	0.67	0.36	0.41	0.037	0.229	2.52	4.25
Eugerres brasilianus	32.83	2.33	0.22	0.03	0.11	0.39	2.27	0.43	14.11	1.75	0.13	0.25	0.2	0.84	0.36	0.13	0.053	0.012	1804	3643
Diapterus rhombeus	33.23	2.34	0.05	0.08	0.15	1.25	2	0.39	9.01	5.86	0.15	0.08	1.73	0.92	0.27	1.17	0.045	0.036	0.813	0.727
Diapterus rhombeus	79.39	1.46	0.05	0.07	0.11	1.52	1.03	0.38	14.53	3.41	0.17	0.08	0.69	1.11	0.21	0.15	0.038	0.134	0.875	0.715
Diapterus rhombeus	29.33	1.61	0.19	0.08	0.1	0.77	1.26	0.34	8.27	4.2	0.21	0.08	0.32	0.49	0.18	0.1	0.025	0.349	0.872	0.786
Diapterus rhombeus	25.36	1.4	0.04	0.03	0.09	1.18	1.19	0.28	6.8	3.23	0.15	0.09	0.92	0.97	0.17	0.18	0.062	0.083	0.193	0.92
Diapterus rhombeus	29.93	1.8	0.05	0.04	0.08	0.68	1.24	0.31	13.59	3.35	0.14	0.08	0.35	0.64	0.21	0.22	0.027	0.22	0.397	0.561
Diapterus rhombeus	32.9	1.67	0.81	0.05	0.1	0.26	1.85	0.36	7.01	4.28	0.15	0.15	0.8	0.63	0.21	0.98	0.048	0.089	0.642	1157
Diapterus rhombeus	99.79	3.04	0.12	0.08	0.06	0.56	2.96	0.58	31.9	2.5	0.21	0.05	0.8	0.45	0.17	0.39	0.046	0.371	1541	1362
Diapterus rhombeus	1.54	0.16	0.19	0.06	0.07	1.07	0.17	0.14	0.53	7.06	0.22	0.23	0.15	1.02	0.27	1.67	0.066	0.186	1237	0.527
Diapterus rhombeus	59.4	2.92	0.19	0.06	0.16	2.37	2.5	0.34	14.65	4.12	0.16	0.04	1.47	0.64	0.16	0.35	0.044	0.223	1445	0.733
Mugil sp.	76.65	26.06	0.08	0.04	0.16	3.68	4.44	0.53	0.97	3.86	1.03	0.09	0.27	0.61	0.33	0.47	0.054	0.106	3024	2013
Mugil sp.	74.25	47.31	0.04	0.02	0.1	2.29	2.52	0.52	1.49	4.53	0.51	0.09	0.15	0.3	0.33	0.6	0.041	0.155	5.45	1248
Mugil sp.	23.76	16.25	1.17	0.03	1.23	0.24	5.81	0.69	2.64	3.79	0.73	0.07	0.24	0.97	0.35	0.57	0.019	0.286	12.34	7.84
Mugil sp.	69.74	171.78	0.12	0.02	0.16	4.35	9.64	0.72	1.05	4.54	0.3	0.06	0.45	0.61	0.42	0.2	0.037	0.011	1.42	2599
Mugil sp.	71.71	182.27	0.11	0.04	0.3	1.47	13.25	0.39	1.85	2.01	0.16	0.08	0.25	0.76	0.33	0.07	0.094	0.33	1.55	1.08
Mugil sp.	33.79	100.82	0.09	0.03	0.11	0.77	3.85	0.3	2.04	2.07	0.15	0.06	0.17	0.54	0.33	0.15	0.039	0.061	4667	3163
Mugil sp.	73.79	39.73	0.05	0.11	0.16	1.73	2.57	0.4	3.66	1.81	0.16	0.05	0.19	0.42	0.33	0.18	0.057	0.045	2055	2845
Mugil sp.	220.29	539.94	0.18	0.11	0.7	7.34	33.38	0.75	8.78	3.21	0.72	0.08	0.91	0.5	0.27	0.21	0.055	0.102	3701	1201
Mugil sp.	1351.05	7.56	0.27	0.89	1.05	0.5	5.87	0.52	1.95	12.18	0.43	0.24	2.02	0.47	0.28	0.43	0.014	0.178	4138	1173
Mugil sp.	35.25	2.83	0.03	0.2	0.03	1.22	1.16	0.52	1.78	4.68	0.17	0.09	0.2	0.17	0.33	0.37	0.027	0.073	0.98	3519
Mugil sp.	47.66	213.19	0.8	0.67	0.13	1.88	20.56	0.35	0.93	2.62	0.6	0.07	0.45	0.37	0.33	0.09	0.238	0.135	1389	2787
