# Supplementary material for: Contamination and oxidative stress biomarkers in estuarine fish following a mine tailing disaster
Source: PeerJ. 2020 Oct 28;8:e10266. doi: 10.7717/peerj.10266 (PMC7602685; doi:10.7717/peerj.10266)
Supplement: Supplemental Information 6 [file peerj-08-10266-s006.xlsx]

## Sheet: surface water
Station	Salinity	Temp (ºC)	pH	TSD (ppm)
ST 1	0.31	22.7	7.56	289
ST 2	1.04	23.8	7.22	1061
ST 3	0.61	23.7	7.35	586
ST 4	0.3	22.4	6.5	307
ST 5	0.25	22.7	7.82	257
ST 6	0.25	22.4	7.25	267
ST 7	0.44	22.4	7.05	443
ST 8	0.15	22.4	7.17	159
ST 9	1.02	23.6	7.34	163
ST 10	0.17	24.7	7.51	170
ST 11	0.18	22.4	7.31	187
ST 12	0.1	22.6	7.87	99
ST 13	0.21	24.86	7.14	211
ST 14	1.6	23.3	7.36	1480
ST 15	3.74	22.3	7.03	3442
ST 16	0.27	23.3	7.78	279
ST 17	0.1	23.2	8.09	102
ST 18	0.16	23.1	7.81	170
ST 19	0.41	23.7	7.35	142
ST 20	1.91	24	7.28	1813
ST 22	1.27	22.3	7.3	1220
ST 23	0.26	23.4	7.6	271
